# Supplementary material
Source: PubMed Central journal article supplement (PMC4779321)
Supplement: Supp_Figure1.pdf [file Supp_Figure1.pdf]

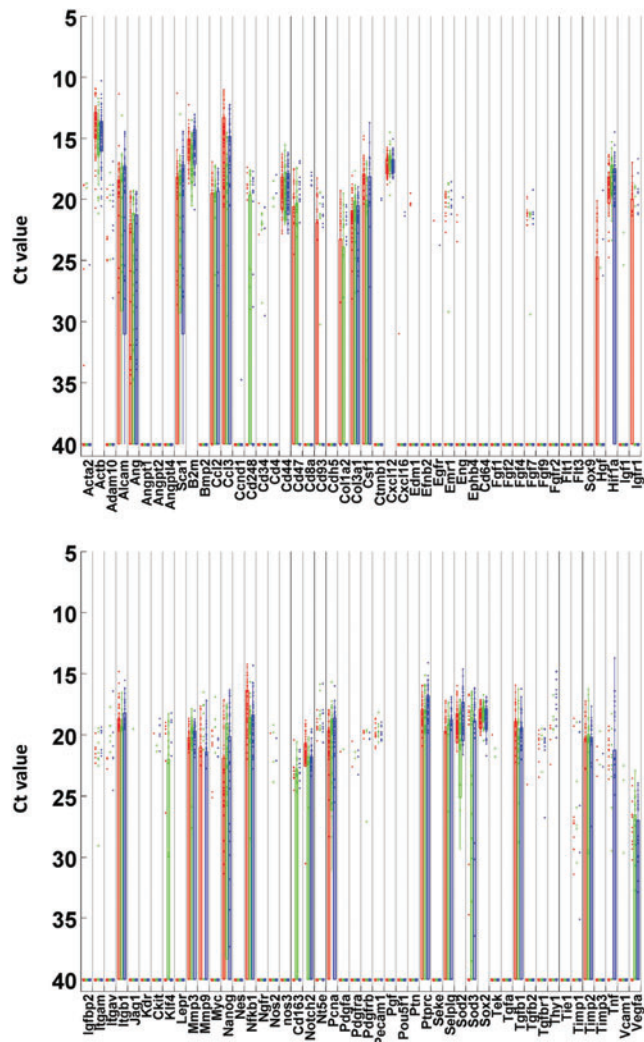

**SUPPLEMENTARY FIG. S1.** Histogram showing quantitative reverse transcription-PCR (qRT-PCR) cycle threshold values for each gene across all treatment groups. Each dot corresponds to a single gene's quantitative real-time polymerase chain reaction, and increased Ct values are indicative of decreased mRNA content.
