# Supplementary material
Source: PubMed Central journal article supplement (PMC4779321)
Supplement: Supp_Table1.pdf [file Supp_Table1.pdf]

## Supplementary Data

SUPPLEMENTARY TABLE S1. GENE NAMES AND ASSAY IDs FOR ALL GENES USED IN MICROFLUIDIC SINGLE-CELL EXPRESSION ANALYSIS

| <i>Gene name</i> | <i>Assay ID</i> | <i>Gene name</i> | <i>Assay ID</i> |
|------------------|-----------------|------------------|-----------------|
| <i>Acta2</i>     | Mm01546133_m1   | <i>Igfbp2</i>    | Mm00492632_m1   |
| <i>Actb</i>      | Mm01205647_g1   | <i>Itgam</i>     | Mm00434464_m1   |
| <i>Adam10</i>    | Mm00545742_m1   | <i>Itgav</i>     | Mm00434506_m1   |
| <i>Alcam</i>     | Mm00711623_m1   | <i>Itgb1</i>     | Mm01253230_m1   |
| <i>Ang</i>       | Mm00833184_s1   | <i>Jag1</i>      | Mm00496902_m1   |
| <i>Angpt1</i>    | Mm00456503_m1   | <i>Kdr</i>       | Mm01222431_m1   |
| <i>Angpt2</i>    | Mm00545822_m1   | <i>Kit</i>       | Mm00445212_m1   |
| <i>Angptl4</i>   | Mm00480431_m1   | <i>Klf4</i>      | Mm00516104_m1   |
| <i>Atxn1</i>     | Mm00726565_s1   | <i>Lepr</i>      | Mm00440181_m1   |
| <i>B2m</i>       | Mm00437764_m1   | <i>Mmp3</i>      | Mm00440295_m1   |
| <i>Bmp2</i>      | Mm01340178_m1   | <i>Mmp9</i>      | Mm00442991_m1   |
| <i>Ccl2</i>      | Mm00441242_m1   | <i>Myc</i>       | Mm00487803_m1   |
| <i>Ccl3</i>      | Mm00441259_g1   | <i>Nanog</i>     | Mm02019550_s1   |
| <i>Ccnd1</i>     | Mm00432359_m1   | <i>Nes</i>       | Mm00450205_m1   |
| <i>Cd248</i>     | Mm00547485_s1   | <i>Nfkb1</i>     | Mm00476361_m1   |
| <i>Cd34</i>      | Mm00519283_m1   | <i>Ngfr</i>      | Mm00446296_m1   |
| <i>Cd4</i>       | Mm00442754_m1   | <i>Nos2</i>      | Mm00440502_m1   |
| <i>Cd44</i>      | Mm01277163_m1   | <i>Nos3</i>      | Mm00435217_m1   |
| <i>Cd47</i>      | Mm00495005_m1   | <i>Notch1</i>    | Mm00435249_m1   |
| <i>Cd8a</i>      | Mm01182108_m1   | <i>Notch2</i>    | Mm00803077_m1   |
| <i>Cd93</i>      | Mm00440239_g1   | <i>Nt5e</i>      | Mm00501910_m1   |
| <i>Cdh5</i>      | Mm00486938_m1   | <i>Pcna</i>      | Mm00448100_g1   |
| <i>Colla2</i>    | Mm01165187_m1   | <i>Pdgfa</i>     | Mm01205760_m1   |
| <i>Col3a1</i>    | Mm01254473_m1   | <i>Pdgfra</i>    | Mm00440701_m1   |
| <i>Csf1</i>      | Mm00432686_m1   | <i>Pdgfrb</i>    | Mm00435546_m1   |
| <i>Ctnnb1</i>    | Mm00517812_m1   | <i>Pecam1</i>    | Mm01242584_m1   |
| <i>Cxcl12</i>    | Mm00445552_m1   | <i>Pgf</i>       | Mm01302896_m1   |
| <i>Cxcl16</i>    | Mm00469712_m1   | <i>Pou5f1</i>    | Mm00658129_gH   |
| <i>Edn1</i>      | Mm00439656_m1   | <i>Ptn</i>       | Mm01132688_m1   |
| <i>Efnb2</i>     | Mm01215897_m1   | <i>Ptprc</i>     | Mm01292575_m1   |
| <i>Egfr</i>      | Mm00433023_m1   | <i>Sele</i>      | Mm00441278_m1   |
| <i>Emr1</i>      | Mm00802529_m1   | <i>Selplg</i>    | Mm01204601_m1   |
| <i>Eng</i>       | Mm00468256_m1   | <i>Sod2</i>      | Mm01313000_m1   |
| <i>Ephb4</i>     | Mm01201157_m1   | <i>Sod3</i>      | Mm01213380_s1   |
| <i>Fcgr1a</i>    | Mm00438874_m1   | <i>Sox2</i>      | Mm00488369_s1   |
| <i>Fgf1</i>      | Mm00438906_m1   | <i>Tek</i>       | Mm01256898_m1   |
| <i>Fgf2</i>      | Mm00433287_m1   | <i>Tgfa</i>      | Mm00446232_m1   |
| <i>Fgf4</i>      | Mm00438917_m1   | <i>Tgfb1</i>     | Mm00441726_m1   |
| <i>Fgf7</i>      | Mm00433291_m1   | <i>Tgfb2</i>     | Mm00436955_m1   |
| <i>Fgf9</i>      | Mm00442795_m1   | <i>Tgfr1</i>     | Mm00436964_m1   |
| <i>Fgfr2</i>     | Mm01269930_m1   | <i>Thy1</i>      | Mm00493681_m1   |
| <i>Flt1</i>      | Mm00438980_m1   | <i>Tie1</i>      | Mm00441786_m1   |
| <i>Flt3</i>      | Mm00438996_m1   | <i>Timp1</i>     | Mm00441818_m1   |
| <i>Sox9</i>      | Mm00448840_m1   | <i>Timp2</i>     | Mm00441825_m1   |
| <i>Hgf</i>       | Mm01135193_m1   | <i>Timp3</i>     | Mm00441826_m1   |
| <i>Hif1a</i>     | Mm01283760_m1   | <i>Tnf</i>       | Mm00443258_m1   |
| <i>Igfl</i>      | Mm00439560_m1   | <i>Vcam1</i>     | Mm01320970_m1   |
| <i>Igflr</i>     | Mm00802831_m1   | <i>Vegfa</i>     | Mm01281447_m1   |

Genes chosen were related to stemness or neovascularization or were cell cycle, surface, or control markers.
